# Supplementary material for: Analysis of sugars and sweeteners via terahertz time-domain spectroscopy
Source: Royal Society of Chemistry journal article supplement (doi:10.1039/d2ay00377e), 2022-01-01
Supplement: d2ay00377e1.pdf [file d2ay00377e1.pdf]

## Support Information for

# Analysis of Sugars and Sweeteners via Terahertz Time-Domain Spectroscopy

Igor José Gomes da Silva<sup>1</sup>, Ivo M. Raimundo Jr.<sup>1</sup> and Boris Mizaikoff<sup>2</sup>

<sup>1</sup>State University of Campinas, Institute of Chemistry, 13083-970, Campinas - SP, Brazil

<sup>2</sup>Ulm University, Institute of Analytical and Bioanalytical Chemistry, 89081, Ulm - BW, Germany

Corresponding authors: [ivo@unicamp.br](mailto:ivo@unicamp.br) and [boris.mizaikoff@uni-ulm.de](mailto:boris.mizaikoff@uni-ulm.de)

**Table S1.** Comparison of the peaks/bands of sugars and sweeteners studied in the present work with those described in the literature.

| Sugar / sweetener | Main peaks/bands (THz) |       |       |       |       |       |       |
|-------------------|------------------------|-------|-------|-------|-------|-------|-------|
|                   | <b>Fructose</b>        |       |       |       |       |       |       |
| This work         |                        |       | 1.704 | 2.127 |       | 2.658 |       |
| Reference 17      |                        |       | 1.72  | 2.14  |       |       |       |
| Reference 42      |                        |       | 1.71  | 2.13  |       |       |       |
|                   | <b>Glucose</b>         |       |       |       |       |       |       |
| This work         |                        | 1.435 |       | 2.065 | 2.512 | 2.658 | 2.942 |
| Reference 39      |                        | 1.42  |       | 2.05  | 2.51  | 2.64  | 2.91  |
|                   | <b>Sucrose</b>         |       |       |       |       |       |       |
| This work         |                        | 1.442 | 1.827 |       | 2.542 |       | 3.388 |
| Reference 31      |                        | 1.47  |       |       |       |       |       |
| Reference 43      |                        | 1.50  | 1.90  |       |       |       |       |
|                   | <b>Lactose</b>         |       |       |       |       |       |       |
| This work         | 0.527                  | 1.373 |       |       | 2.550 | 2.881 | 3.257 |
| Reference 23      | 0.53                   |       |       |       |       |       |       |
| Reference 42      | 0.53                   | 1.37  |       |       |       |       |       |
| Reference 44      | 0.53                   | 1.38  |       |       | 2.56  |       |       |
| Reference 45      | 0.53                   |       |       |       |       |       |       |
|                   | <b>Saccharin</b>       |       |       |       |       |       |       |
| This work         |                        |       | 1.988 |       |       | 2.664 | 3.450 |
| Reference 25      |                        |       | 1.98  |       |       |       |       |

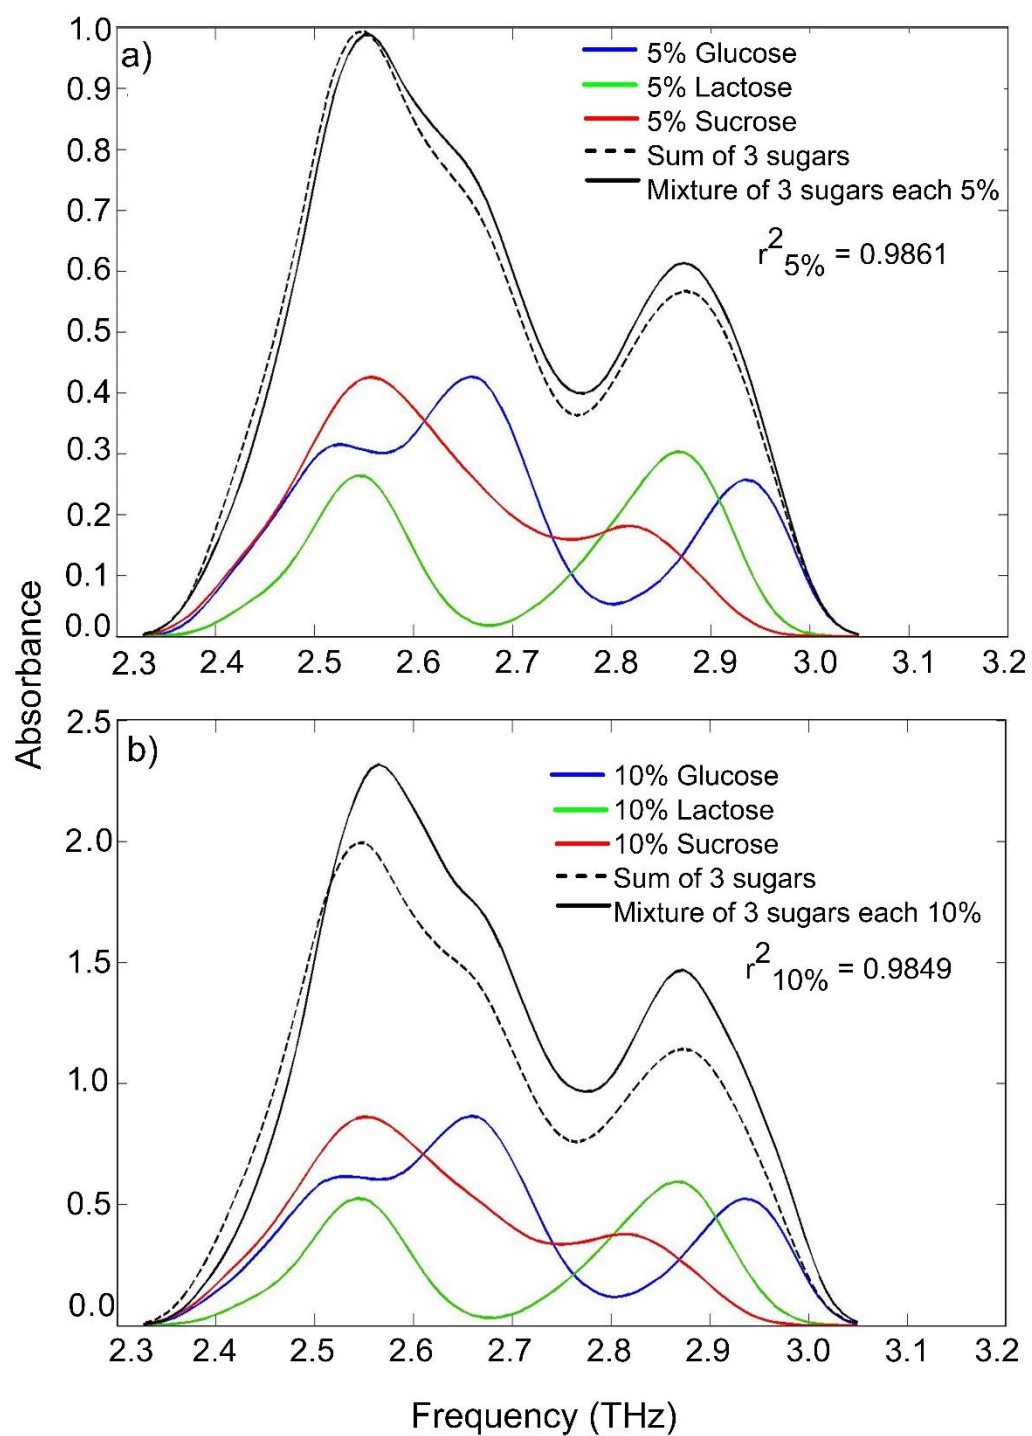

**Figure S1.** Gaussian peak fitting of individual sugars and mixture (M1) from 2.33 to 3.05 THz, and characteristic sub-peaks. (a) Coefficient of determination (i.e., similarity) between 5% and (b) 10% sugar mixture – M1 (solid line) and the simulated mixture curve from pure sugar spectra (dashed line);

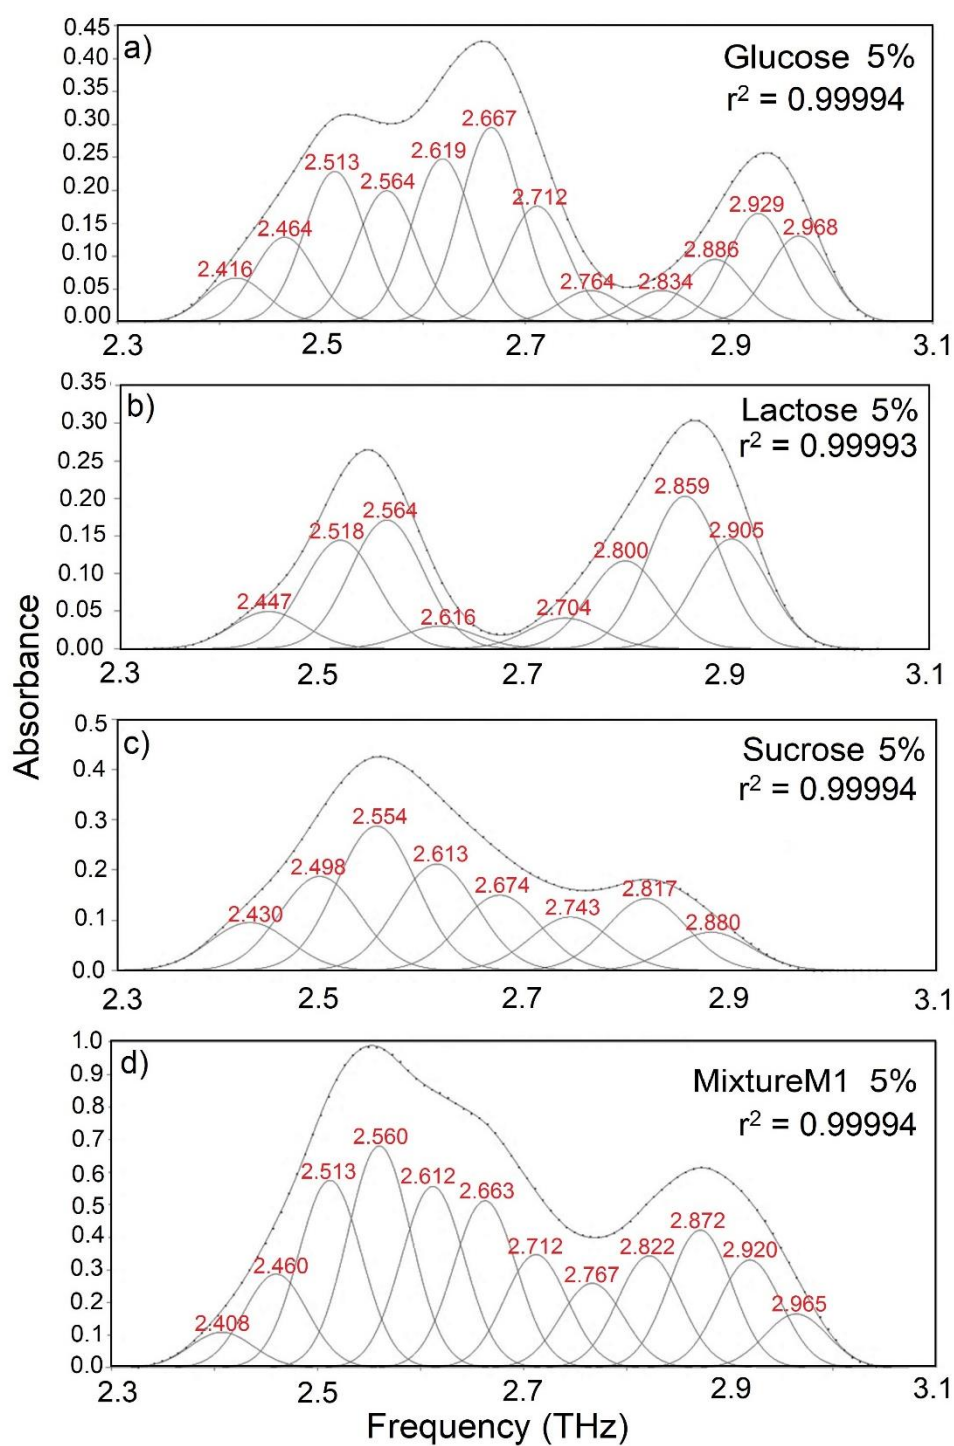

**Figure S2.** Gaussian peak fitting of individual sugars and mixture (M1) from 2.33 to 3.05 THz, and characteristic sub-peaks. (a) sub-peaks of glucose (5%); (b) sub-peaks of lactose (5%), (c) sub-peaks of sucrose (5%) and (d) sup-peaks of mixture 1 (5%).

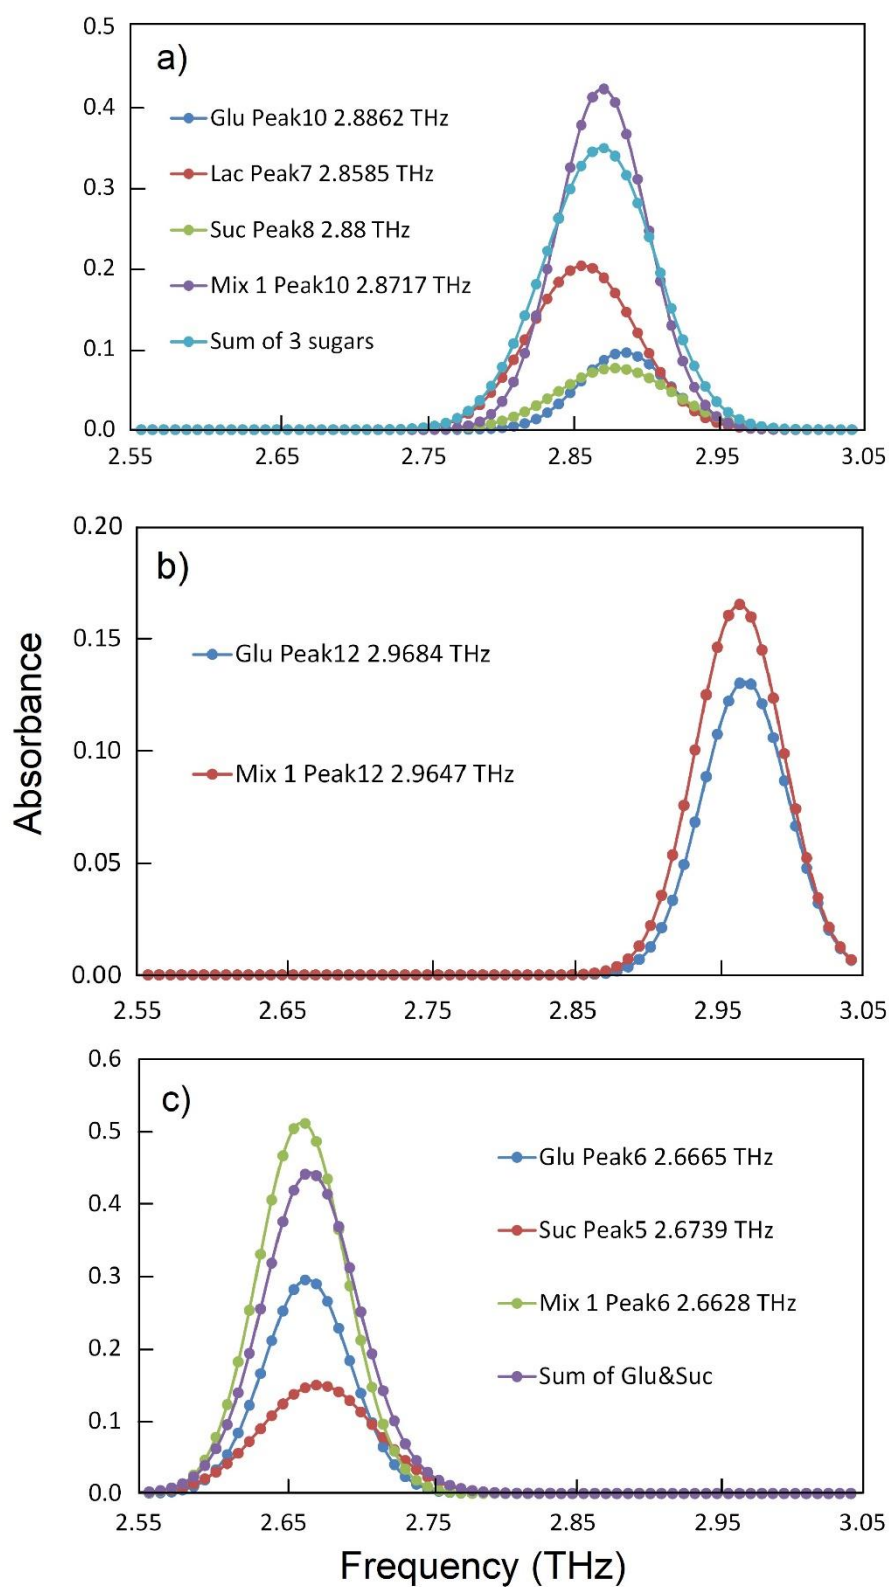

**Figure S3.** (a) Sub-peaks 10 of glucose, 7 of lactose, 8 of sucrose, 10 of the mixture at concentration of 5% and the sum of the three sub-peaks cited of pure sugars; (b) Sub-peaks 12 of glucose and mixture 1 (ternary) in 5%; (c) Sub-peaks 6 of glucose, 5 of sucrose and 6 of mixture in 5% and sum of the two sub-peaks cited from the pure sugars.

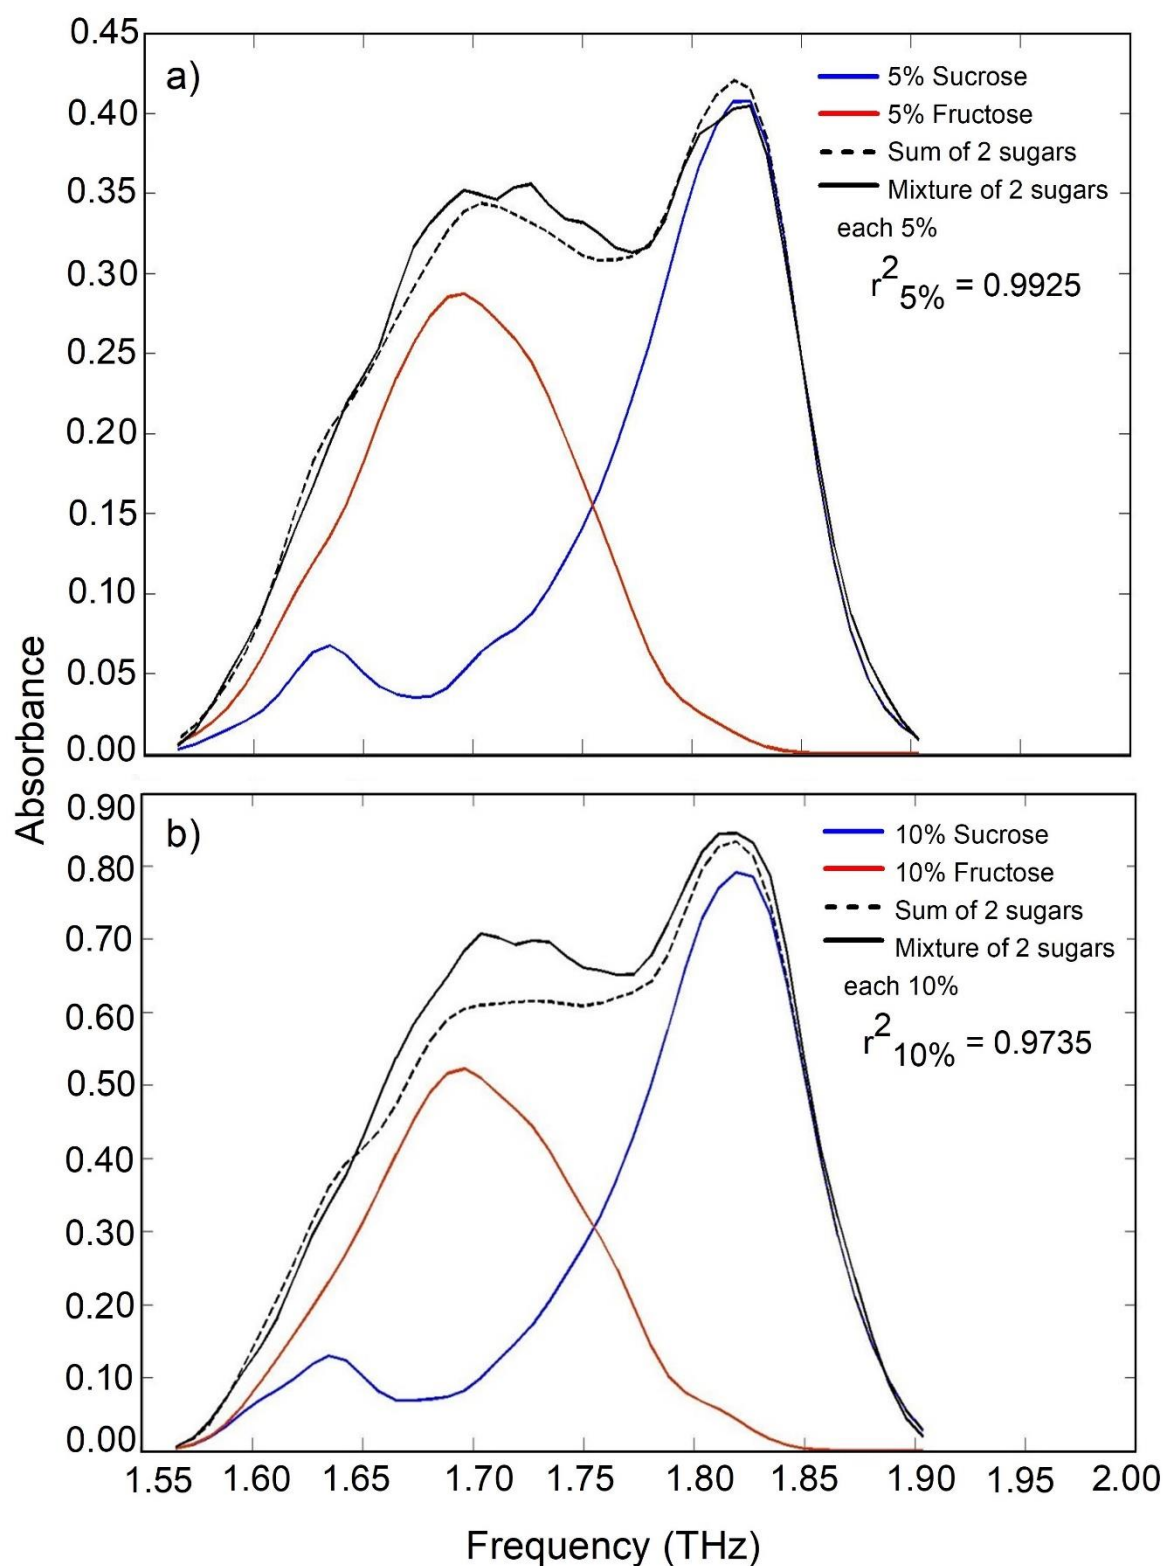

**Figure S4.** Gaussian peak fitting of individual sugars and mixture (M2) from 1,56 to 1,91 THz, and characteristic sub-peaks. (a) Coefficient of determination (i.e., similarity) between 5% and (b) 10% sugar mixture – M2 (solid line) and the simulated mixture curve from pure sugar spectra (dashed line).

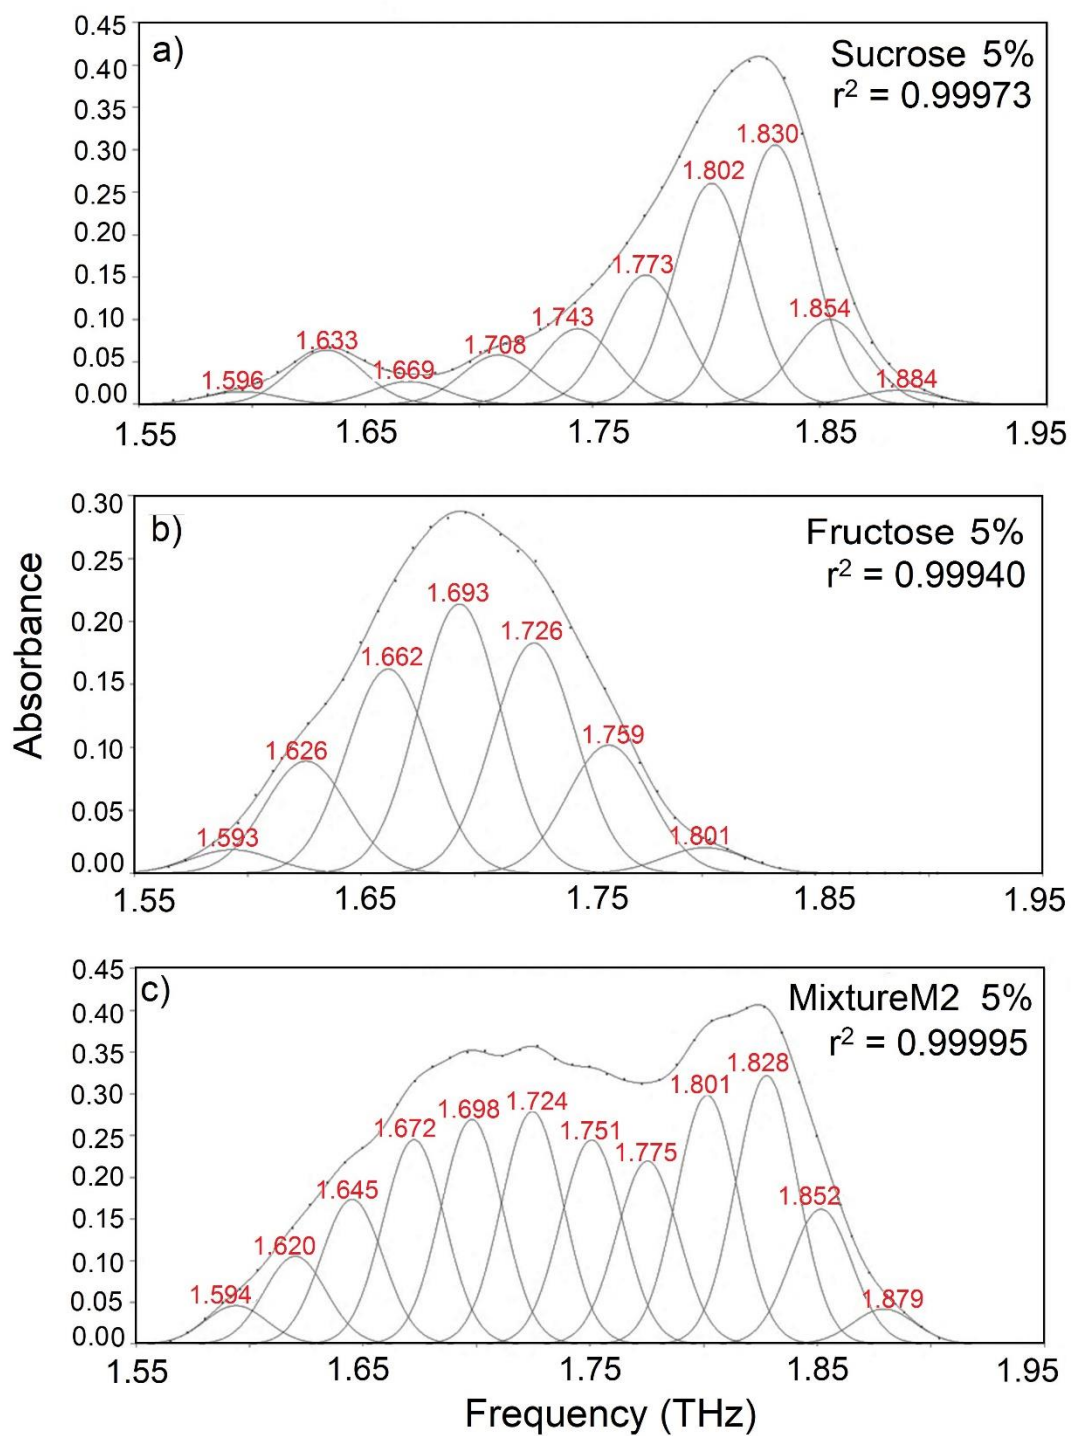

**Figure S5.** Gaussian peak fitting of individual sugars and mixture (M2) from 1,56 to 1,91 THz, and characteristic sub-peaks. a) sub-peaks of sucrose, highlighting the sub-peaks with the center at 1.83, 1.85 and 1.88 THz (5%); b) sup-peaks of fructose, highlighting the sub-peak with the center at 1.69 THz (5%) and (c) sub-peaks of mixture 2 (5%).



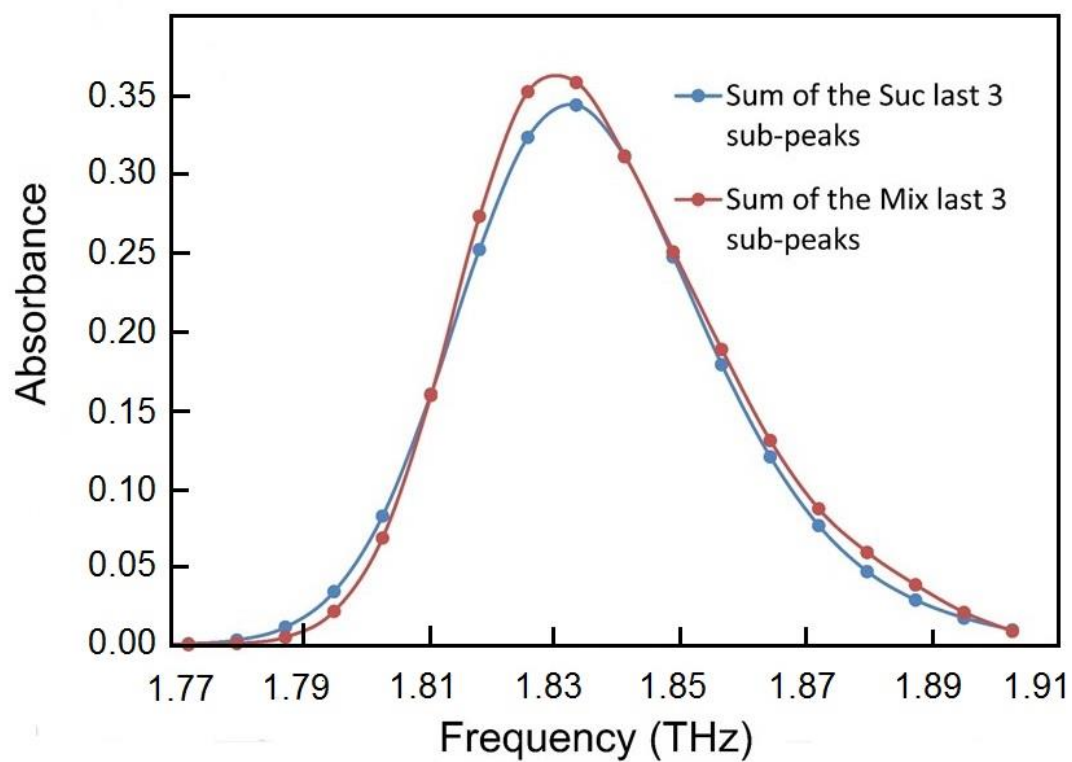

**Figure S6.** Sum of the last sub-peaks of pure sucrose and the sum of the last sub-peaks of mixture 2 in 5%.
